# Supplementary material
Source: publisher site journal article supplement (https://www.dovepress.com/article/262690)
Supplement: Supplementary file 1 [file get_supplementary_file.php]

*Int. J. Nanomedicine*

**Supplementary Materials**

**Indocyanine green and curcumin co-loaded nano-fireball-like albumin nanoparticles based on near-infrared-induced hyperthermia for tumor ablation**

Phuong Thi Thu Pham, Xuan Thien Le, Hanju Kim, Hwang Kyung Kim, Eun Seong Lee, Kyung Taek Oh, Han-Gon Choi, Yu Seok Youn

**Figure S1.** Fluorescence spectra for curcumin samples with three different concentrations showing peak emission wavelength of 520 nm.


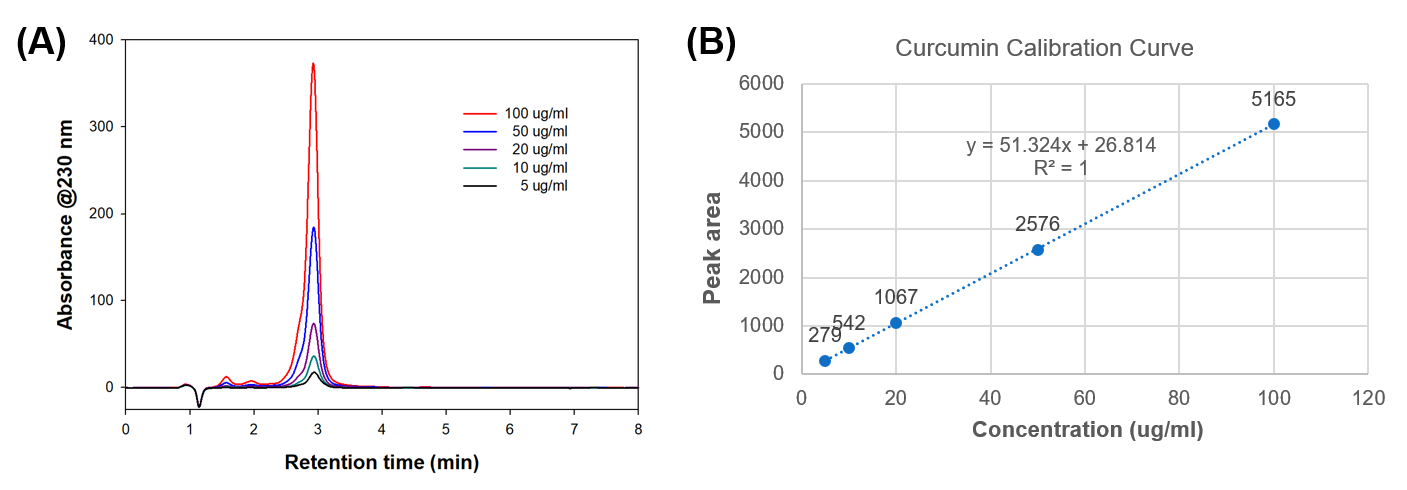


**Figure S2.** (A) Reversed-phase HPLC chromatogram for curcumin at the UV wavelength of 230 nm. The isocratic elution method was carried out at a flow-rate of 1.0 ml/min using solvent A (DW containing 0.1% trifluoroacetic acid) and solvent B (ACN containing 0.1% trifluoroacetic acid); that is, 0–60% B for 10 min. (B) Calibration curve of curcumin.
